# Supplementary material for: SARS-CoV-2 Proteins Interact with Alpha Synuclein and Induce Lewy Body-like Pathology In Vitro
Source: MDPI journal article supplement (doi:10.3390/ijms23063394), 2022-03-21
Supplement: s1 [file s1]

## Supplementary Materials

**Table S1.** Related primer sequences to qRT-PCR.

| Gene Name    | Primers                                                               |
|--------------|-----------------------------------------------------------------------|
| <i>SNCA</i>  | Forward 5'- GTGGCTGCTGCTGAGAAAAC<br>Reverse 5'- CACCACTGCTCCTCCAACAT  |
| <i>GAPDH</i> | Forward 5'- TGCACCACCAACTGCTTAGC<br>Reverse 5'- GGCATGGACTGTGGTCATGAG |
| S protein    | Forward 5'- CCTGGTTCCATGCCATCCAT<br>Reverse 5'- TCCAGGGTGGTGCCAAAAAT  |
| N protein    | Forward 5'- ACCAAAGGACCACATTGGCA<br>Reverse 5'- ATAGAAGCCCTTTGGCAGGG  |

**Table S2.** The antibodies associated with this research.

| Primary Antibodies                    | Type                          | Source         |
|---------------------------------------|-------------------------------|----------------|
| anti- a-Syn                           | mouse monoclonal (LB509)      | Abcam          |
| anti- a-Syn                           | rabbit monoclonal (ab13850)   | Abcam          |
| anti-S <sub>1</sub> protein           | rabbit polyclonal(40591-T62)  | SinoBiological |
| anti-S <sub>1</sub> protein           | mouse monoclonal(40591-MM42)  | SinoBiological |
| anti- N <sub>1</sub> protein          | rabbit monoclonal(40143-R019) | SinoBiological |
| anti- N <sub>1</sub> protein          | mouse monoclonal(40588-MM137) | SinoBiological |
| anti – p129- $\alpha$ Syn             | rabbit monoclonal(ab124821)   | Abcam          |
| anti-GAPDH                            | rabbit polyclonal(10494-1-AP) | proteintech    |
| anti-aggregated a-Syn (5G4)           | mouse monoclonal l((MABN389)) | Millipore      |
| iFluorTM 633                          | goat anti-rabbit              | Abcam          |
| Alexa Fluor 552                       | goat anti-mouse               | Abcam          |
| Alexa Fluor 552                       | goat anti-rabbit              | Abcam          |
| IRDye-conjugated secondary antibodies | goat anti-mouse               | Odyssey        |
| IRDye-conjugated secondary antibodies | goat anti-rabbit              | Odyssey        |
